# Supplementary material for: A Ti-anchored Ti2CO2 monolayer (MXene) as a single-atom catalyst for CO oxidation
Source: Royal Society of Chemistry journal article supplement (doi:10.1039/c6ta00554c), 2016-01-01
Supplement: c6ta00554c1.pdf [file c6ta00554c1.pdf]

## Ti-Anchored $\text{Ti}_2\text{CO}_2$ Monolayer (MXene) as a Single-Atom Catalyst for CO Oxidation

Xu Zhang, Jincheng Lei, Dihua Wu, Xudong Zhao, Yu Jing and Zhen Zhou\*

Tianjin Key Laboratory of Metal and Molecule Based Material Chemistry, Computational Centre for Molecular Science, Institute of New Energy Material Chemistry, Collaborative Innovation Center of Chemical Science and Engineering (Tianjin), School of Materials Science and Engineering, National Institute for Advanced Materials, Nankai University, Tianjin 300350, P.R. China

**Table S1.** The binding energies  $E_b$  (eV) and atomic charge a.c. ( $|e|$ ) of anchoring Ti at three different anchoring sites of  $\text{Ti}_2\text{CO}_2$  monolayer.

|           | Ti    |
|-----------|-------|
| $E_b$ (1) | -7.68 |
| $E_b$ (2) | -7.22 |
| $E_b$ (3) | -3.51 |
| a.c. (1)  | +1.55 |
| a.c. (2)  | +1.53 |
| a.c. (3)  | +0.96 |

**Table S2.** The diffusion barriers  $E$  (eV) of Ti on  $\text{Ti}_2\text{CO}_2$  monolayer (Fig. S2).

|                    | Ti   |
|--------------------|------|
| $E(\text{IS-TS1})$ | 1.43 |
| $E(\text{MS-TS2})$ | 0.99 |

**Table S3.** The binding energies  $E_b$  (eV) of the second Ti on site 1.

|       | Ti    |
|-------|-------|
| $E_b$ | -2.18 |

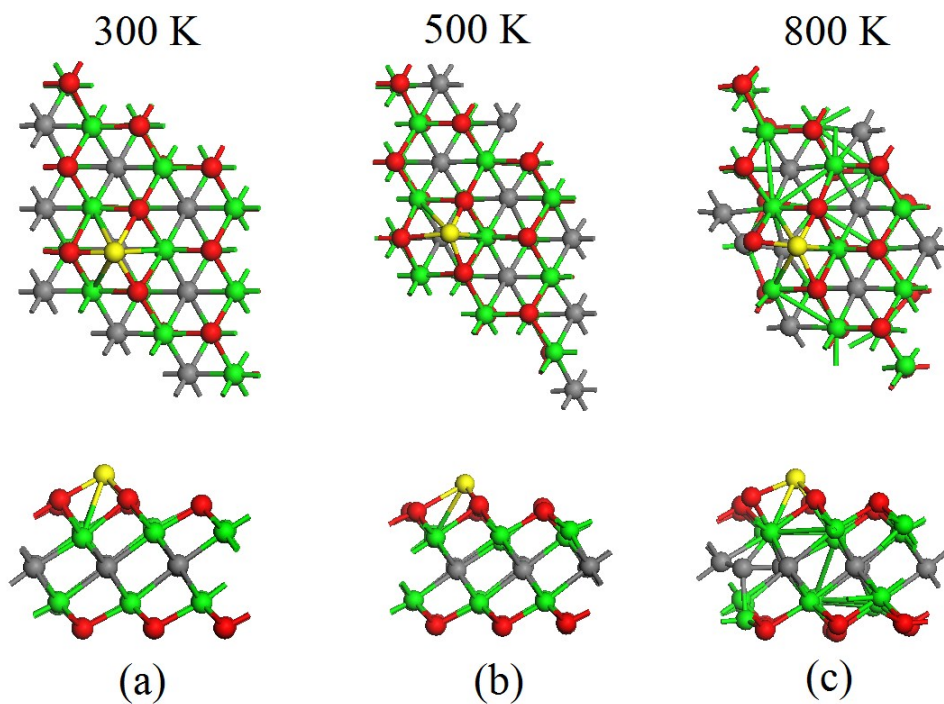

**Fig. S1** A snapshot of the equilibrium structure of Ti/Ti<sub>2</sub>CO<sub>2</sub> at (a) 300 K, (b) 500 K, and (c) 800 K, respectively, at the end of 5 ps first-principles molecular dynamic (MD) simulation.

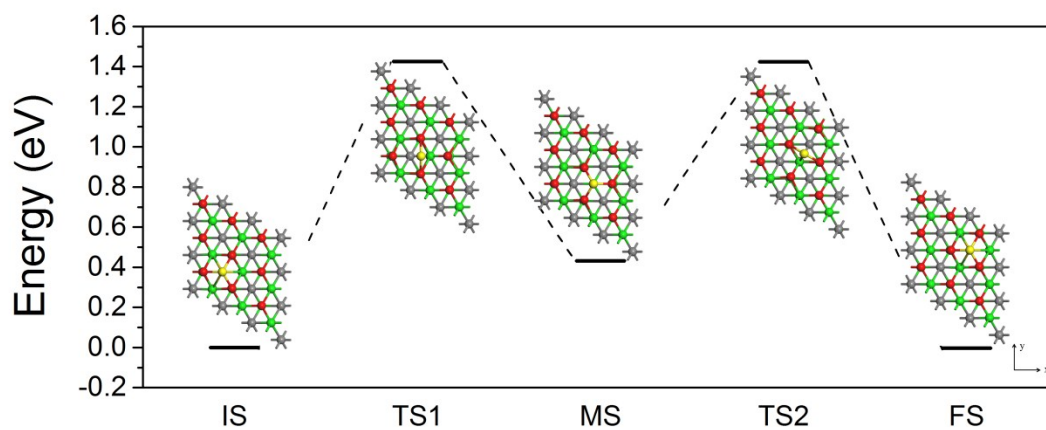

**Fig. S2** Diffusion pathway of anchoring Ti on Ti<sub>2</sub>CO<sub>2</sub> monolayer.

**Table S4.** The adsorption energies  $E_{\text{ad}}$  (eV), the atomic charge a.c. (|e|) and the bond length  $d$  (Å) of  $\text{O}_2$  and CO on Ti-anchored  $\text{Ti}_2\text{CO}_2$  monolayer.

|                             | Ti    |
|-----------------------------|-------|
| $E_{\text{ad}}(\text{O}_2)$ | -4.83 |
| a.c. ( $\text{O}_2$ )       | -0.78 |
| $d(\text{O}_2)$             | 1.46  |
| $E_{\text{ad}}(\text{CO})$  | -1.11 |
| a.c. (CO)                   | -0.22 |
| $d(\text{CO})$              | 1.15  |

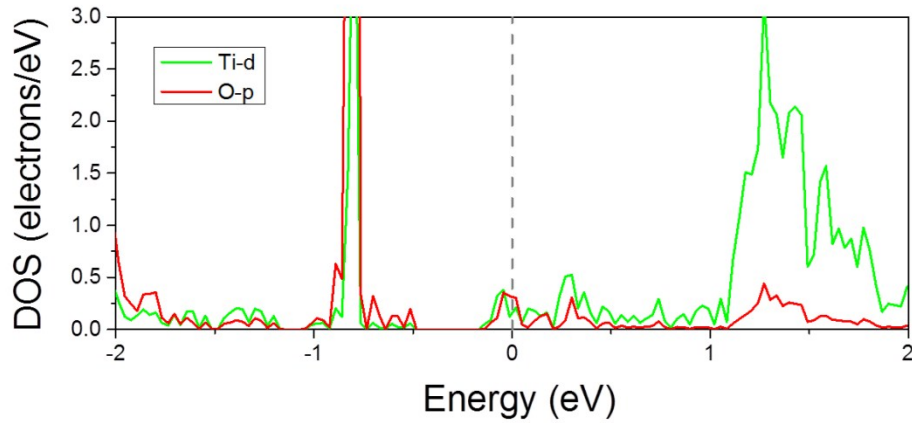

**Fig. S3** Computed projected density of states (PDOS) for the p-orbital of the adsorbed  $\text{O}_2$  molecular and the  $d$ -orbital of the anchored Ti.

**Table S5.** The bond length  $d$  (Å) of each state on Ti-anchored  $\text{Ti}_2\text{CO}_2$  monolayer (Fig. 4).

| State | Bond     | Ti   |
|-------|----------|------|
| IS    | d(O1-O2) | 1.46 |
| TS1   | d(C-O1)  | 2.36 |
|       | d(C-O2)  | 2.22 |
|       | d(O1-O2) | 2.20 |
| MS1   | d(C-O1)  | 1.36 |
|       | d(C-O2)  | 1.41 |
|       | d(M-O1)  | 1.94 |
|       | d(M-O2)  | 1.86 |
| TS2   | d(C-O2)  | 1.99 |
|       | d(M-O1)  | 2.13 |
| MS2   | d(O1-O2) | 3.15 |
| TS3   | d(C-O2)  | 1.67 |
| FS1   | d(M-O2)  | 2.12 |

**Table S6.** Energy barriers  $E$  (eV) and reaction energies  $\Delta E$  (eV) of each state on Ti-anchored  $\text{Ti}_2\text{CO}_2$  monolayer (Fig. 4).

|                            | Ti    |
|----------------------------|-------|
| $E(\text{IS-TS1})$         | 0.25  |
| $E(\text{MS1-TS2})$        | 0.37  |
| $E(\text{MS3-TS3})$        | 1.01  |
| $\Delta E(\text{IS-MS1})$  | -3.67 |
| $\Delta E(\text{MS1-MS2})$ | -0.03 |
| $\Delta E(\text{MS3-FS1})$ | -0.08 |

**Table S7.** The binding energies  $E_b$  (eV) and the atomic charge a.c. ( $|e|$ ) of the O atom above the anchoring Ti.

|                 | Ti    |
|-----------------|-------|
| $E_b(\text{O})$ | -8.55 |
| a.c. (O)        | -0.69 |

**Table S8.** The bond length  $d$  (Å) of each state on Ti-anchored  $\text{Ti}_2\text{CO}_2$  monolayer (Fig. 5).

| State | Bond  | Ti   |
|-------|-------|------|
| TS    | C1-O1 | 2.61 |
|       | O1-O2 | 2.59 |
| FS2   | O1-M  | 2.47 |
|       | O2-M  | 2.31 |

**Table S9.** Energy barriers  $E$  (eV) and reaction energies  $\Delta E$  (eV) of each state on Ti-anchored  $\text{Ti}_2\text{CO}_2$  monolayer (Fig. 5).

|                           | Ti    |
|---------------------------|-------|
| $E(\text{IS-TS})$         | 0.23  |
| $\Delta E(\text{IS-FS2})$ | -0.39 |

**Table S10.** The bond length  $d$  (Å) of each state on Ti/Cr anchored  $\text{Ti}_2\text{CO}_2$  monolayer (Fig. 6 and Fig. S6).

| State | Bond     | Ti   |
|-------|----------|------|
| IS    | d(O1-O2) | 1.49 |
|       | d(M-C)   | 2.16 |
|       | d(M-O2)  | 1.88 |
| TS1   | d(O1-O2) | 1.73 |
|       | d(C-O1)  | 1.34 |
|       | d(M-C)   | 2.19 |
|       | d(M-O2)  | 1.81 |
| MS1   | d(O1-O2) | 2.74 |
|       | d(C-O1)  | 1.18 |
|       | d(M-O1)  | 3.04 |
| MS2   | d(M-O2)  | 1.67 |
|       | d(C-O2)  | 2.41 |
|       | d(M-O2)  | 1.70 |
| TS2   | d(C-O2)  | 1.62 |
| MS3   | d(C-O2)  | 1.32 |
|       | d(M-O2)  | 1.94 |
| TS3   | d(M-O2)  | 2.10 |
| FS    | d(M-O2)  | 2.36 |

**Table S11.** Energy barriers  $E$  (eV) and reaction energies  $\Delta E$  (eV) of each state on Ti/Cr anchored  $\text{Ti}_2\text{CO}_2$  monolayer (Fig. 4 and Fig. S4).

|                            | Ti    |
|----------------------------|-------|
| $E(\text{IS-TS1})$         | 0.33  |
| $E(\text{MS2-TS2})$        | 0.35  |
| $E(\text{MS3-TS3})$        | 0.35  |
| $\Delta E(\text{IS-MS1})$  | -3.59 |
| $\Delta E(\text{MS2-MS3})$ | 0.15  |
| $\Delta E(\text{MS3-FS1})$ | 0.14  |

**Table S12.** The binding energies  $E_b$  (eV) and atomic charge a.c. ( $|e|$ ) of single-metal atom  $M$  at three different anchoring sites of  $\text{Ti}_2\text{CO}_2$  monolayer.

|          | Cr    | Au    | Co    | Rh    | Ru    | Pd    | Cu    | Fe    |
|----------|-------|-------|-------|-------|-------|-------|-------|-------|
| $E_b(1)$ | -7.72 | -0.86 | -4.48 | -3.32 | -5.10 | -1.75 | -2.23 | -5.75 |
| $E_b(2)$ | -6.62 | -0.34 | -4.04 | -2.96 | -4.56 | -1.81 | -2.06 | -4.92 |
| $E_b(3)$ | -3.36 | -1.11 | -2.89 | -1.20 | -2.81 | -1.61 | -0.69 | -3.01 |
| a.c. (1) | +1.25 | +0.33 | +0.71 | +0.49 | +0.68 | +0.37 | +0.78 | +0.85 |
| a.c. (2) | +1.14 | +0.34 | +0.85 | +0.61 | +0.89 | +0.46 | +0.78 | +1.03 |
| a.c. (3) | 0.84  | +0.36 | +0.60 | +0.44 | +0.63 | +0.41 | +0.43 | +0.69 |

Considering the stability of the  $M$ -anchored  $\text{Ti}_2\text{CO}_2$ , we used the structure with the highest binding energy. As shown in Table S12, the binding energy of Cr in site 1 is even higher than that of Ti and is at least  $\sim 2$  eV higher than that of other atoms. Then the diffusion behavior of anchoring Cr on  $\text{Ti}_2\text{CO}_2$  monolayer was examined and the diffusion barriers are shown in Fig. S4. The high diffusion barrier (1.86 eV) indicates it is difficult to agglomerate for Cr on  $\text{Ti}_2\text{CO}_2$ .



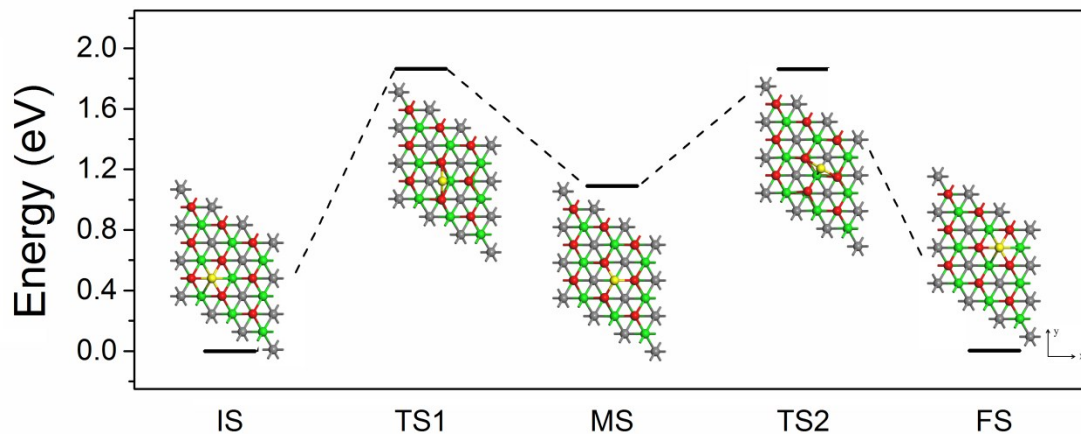

**Fig. S4** Diffusion pathway of anchoring Cr on  $\text{Ti}_2\text{CO}_2$  monolayer.

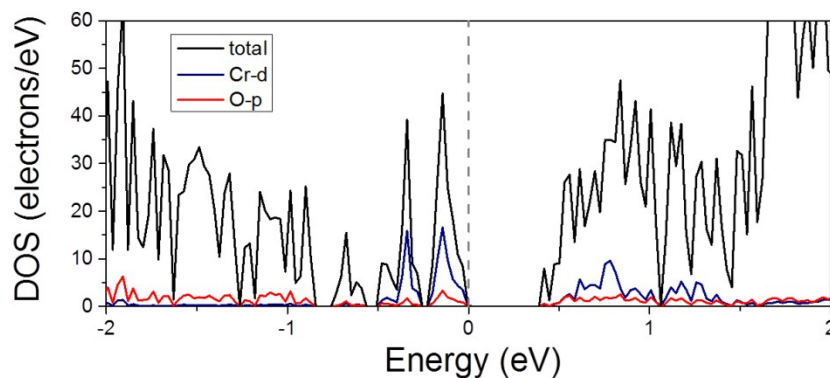

**Fig. S5** Computed total density of states (TDOS) and projected density of states (PDOS) for the Cr-anchored  $\text{Ti}_2\text{CO}_2$ .

The total density of states (TDOS) and projected density of states (PDOS) for Cr-anchored  $\text{Ti}_2\text{CO}_2$  were also calculated (Fig. S5) to investigate the interaction between the  $\text{Ti}_2\text{CO}_2$  monolayer and the anchoring Cr. Compared with Ti atoms (Fig. 2), Cr would have less empty  $d$  state, thus, the interaction between anchoring Cr atoms and adsorbed  $\text{O}_2$  or CO would be weaker.

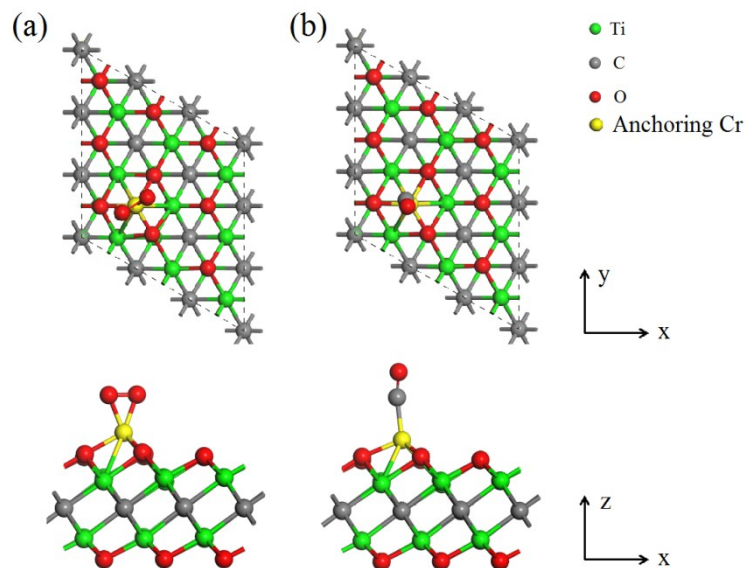

**Fig. S6** Top (upper) and side (lower) view of the optimized energetically most favorable structures of (a)  $O_2$  and (b)  $CO$  adsorbed on Cr-anchored  $Ti_2CO_2$ .

The most energetically favorable configuration for the  $O_2$  and  $CO$  adsorption on Cr-anchored  $Ti_2CO_2$  is shown in Fig. S6. More details are shown in Table S13. The PDOS for the  $d$ -orbital of Cr atoms and the  $p$ -orbital of adsorbed  $O_2$  was also calculated as shown in Fig. S7.

**Table S13.** The adsorption energies  $E_{ad}$  (eV), the atomic charge a.c. ( $|e|$ ) and the bond length  $d$  (Å) of  $O_2$  and  $CO$  on Cr-anchored  $Ti_2CO_2$  monolayer.

|                | Cr    |
|----------------|-------|
| $E_{ad}(O_2)$  | -3.74 |
| a.c. ( $O_2$ ) | -0.61 |
| $d(O_2)$       | 1.43  |
| $E_{ad}(CO)$   | -1.02 |
| a.c. ( $CO$ )  | -0.17 |
| $d(CO)$        | 1.15  |

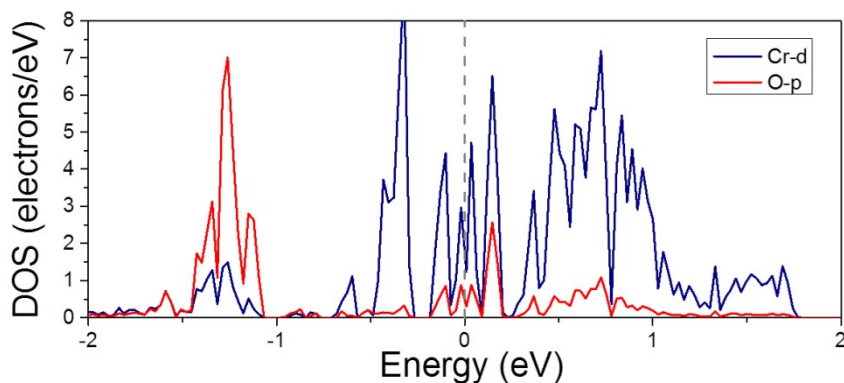

**Fig. S7** Computed projected density of states (PDOS) for the  $p$ -orbital of the adsorbed  $O_2$  molecular and the  $d$ -orbital of the anchored Cr.

The strong hybridization between the  $d$ -orbital of Cr atoms and the  $p$ -orbital of  $O_2$  could be clearly seen from the PDOS. However, compared with Ti/Ti<sub>2</sub>CO<sub>2</sub> (Table S4), the adsorption energy of  $O_2$  and CO is lower, which is consistent with the analysis from PDOS (Fig. S5 and Fig. 2). Moreover, the bond length of  $O_2$  adsorbed on Ti/Ti<sub>2</sub>CO<sub>2</sub> is longer which could indicate that the  $O_2$  adsorbed on Ti/Ti<sub>2</sub>CO<sub>2</sub> would be more activated. To further prove the analysis, the mechanisms of CO oxidation on Cr-anchored Ti<sub>2</sub>CO<sub>2</sub> were also investigated.

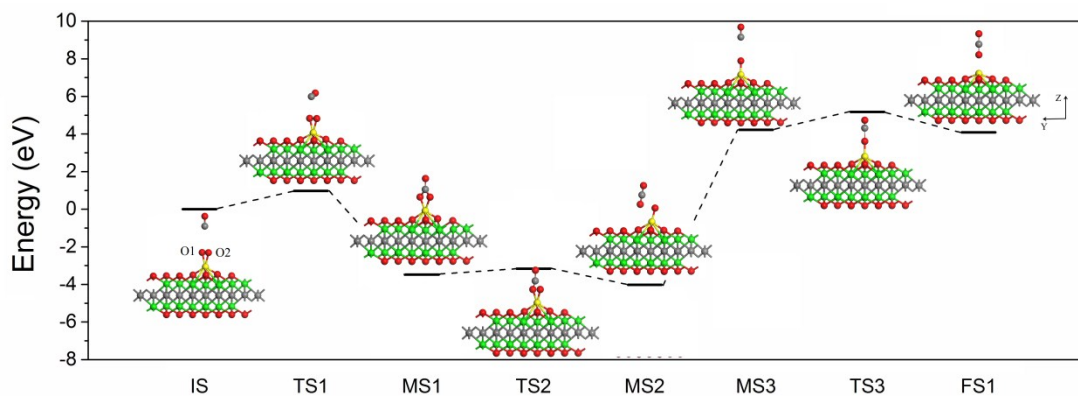

**Fig. S8** The reaction path way I of CO oxidation on Cr-anchored Ti<sub>2</sub>CO<sub>2</sub> monolayer via ER mechanism.

**Table S14.** The bond length  $d$  (Å) of each state on Cr-anchored  $\text{Ti}_2\text{CO}_2$  monolayer (Fig. S8).

| State | Bond     | Cr   |
|-------|----------|------|
| IS    | d(O1-O2) | 1.43 |
| TS1   | d(C-O1)  | 2.63 |
|       | d(C-O2)  | 2.55 |
|       | d(O1-O2) | 2.15 |
| MS1   | d(C-O1)  | 1.37 |
|       | d(C-O2)  | 1.37 |
|       | d(M-O1)  | 1.85 |
| TS2   | d(M-O2)  | 1.86 |
|       | d(C-O2)  | 1.77 |
| MS2   | d(M-O1)  | 2.10 |
|       | d(O1-O2) | 2.90 |
| TS3   | d(C-O2)  | 1.52 |
| FS1   | d(M-O2)  | 2.10 |

**Table S15.** Energy barriers  $E$  (eV) and reaction energies  $\Delta E$  (eV) of each state on Cr-anchored  $\text{Ti}_2\text{CO}_2$  monolayer (Fig. S8).

|                            | Cr    |
|----------------------------|-------|
| $E(\text{IS-TS1})$         | 0.97  |
| $E(\text{MS1-TS2})$        | 0.31  |
| $E(\text{MS3-TS3})$        | 1.05  |
| $\Delta E(\text{IS-MS1})$  | -3.48 |
| $\Delta E(\text{MS1-MS2})$ | -0.54 |
| $\Delta E(\text{MS3-FS1})$ | -0.13 |

**Table S16.** The binding energies  $E_b$  (eV) and the atomic charge a.c. ( $|e|$ ) of the O atom above the anchoring Cr.

|           | Cr    |
|-----------|-------|
| $E_b$ (O) | -7.80 |
| a.c. (O)  | -0.62 |

As shown in Table S15, the energy barriers of the first and last process are much higher than that of Ti/Ti<sub>2</sub>CO<sub>2</sub>, which further supports the analysis from PDOS and the bond length of the activated O<sub>2</sub>.

Then, the ER mechanism via pathway II was also investigated as shown in Fig. S9.

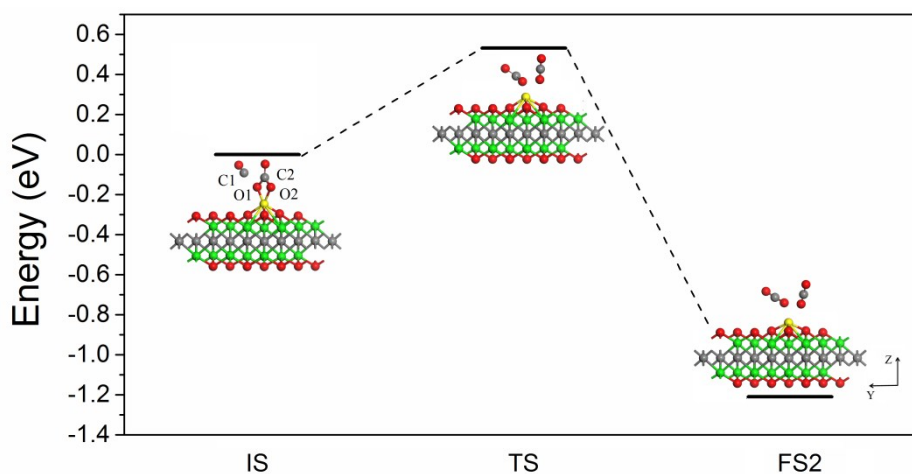

**Fig. S9** Reaction pathway II of CO oxidation on Cr-anchored Ti<sub>2</sub>CO<sub>2</sub> monolayer via ER mechanism.

**Table S17.** The bond length  $d$  (Å) of each state on Cr-anchored Ti<sub>2</sub>CO<sub>2</sub> monolayer (Fig. S9).

| State | Bond  | Cr   |
|-------|-------|------|
| TS    | C1-O1 | 1.62 |
|       | O1-O2 | 2.43 |
| FS2   | O1-M  | 2.26 |
|       | O2-M  | 2.21 |

**Table S18.** Energy barriers  $E$  (eV) and reaction energies  $\Delta E$  (eV) of each state on Cr-anchored  $\text{Ti}_2\text{CO}_2$  monolayer (Fig. S9).

|                           | Cr    |
|---------------------------|-------|
| $E(\text{IS-TS})$         | 0.53  |
| $\Delta E(\text{IS-FS2})$ | -1.21 |

As shown in Table S18, the energy barrier of this process is low and exothermic. However, the energy barrier of the first process of ER mechanism is very high (0.97 eV).

Then, the LH mechanism for CO oxidation in Cr/ $\text{Ti}_2\text{CO}_2$  was also considered as shown in Fig.S10.

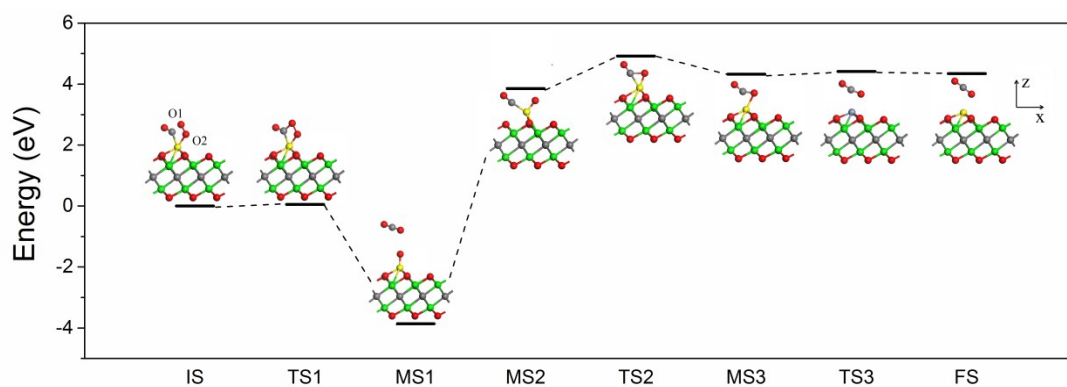

**Fig. S10** The reaction path way of CO oxidation on Cr-anchored  $\text{Ti}_2\text{CO}_2$  monolayer via LH mechanism.

**Table S19.** The bond length  $d$  (Å) of each state on Cr-anchored  $\text{Ti}_2\text{CO}_2$  monolayer (Fig. S10).

| State | Bond     | Cr   |
|-------|----------|------|
| IS    | d(O1-O2) | 1.50 |
|       | d(M-C)   | 2.05 |
|       | d(M-O2)  | 1.77 |
| TS1   | d(O1-O2) | 1.67 |
|       | d(C-O1)  | 1.35 |
|       | d(M-C)   | 2.07 |
| MS1   | d(M-O2)  | 1.70 |
|       | d(O1-O2) | 2.78 |
|       | d(C-O1)  | 1.18 |
| MS2   | d(M-O1)  | 4.35 |
|       | d(M-O2)  | 1.64 |
|       | d(C-O2)  | 2.59 |
| TS2   | d(M-O2)  | 1.58 |
|       | d(C-O2)  | 1.60 |
| MS3   | d(C-O2)  | 1.26 |
|       | d(M-O2)  | 2.04 |
| TS3   | d(M-O2)  | 2.29 |
| FS    | d(M-O2)  | 2.25 |

**Table S20.** Energy barriers  $E$  (eV) and reaction energies  $\Delta E$  (eV) of each state on Cr-anchored  $\text{Ti}_2\text{CO}_2$  monolayer (Fig. S10).

|                      | Cr    |
|----------------------|-------|
| E(IS-TS1)            | 0.08  |
| E(MS2-TS2)           | 1.01  |
| E(MS3-TS3)           | 0.09  |
| $\Delta E$ (IS-MS1)  | -3.86 |
| $\Delta E$ (MS2-MS3) | 0.47  |
| $\Delta E$ (MS3-FS1) | 0.01  |

The barrier energies of the first and last process of LH mechanism (0.08 and 0.09 eV) are almost barrierless. However, the barrier energy of the second process of LH mechanism is much higher (1.01 eV) than that of ER mechanism via path way II (0.97 and 0.53 eV). Moreover, the last two processes are thermodynamically unfavored. From the above results, Ti/Ti<sub>2</sub>CO<sub>2</sub> would exhibit better performance than Cr/Ti<sub>2</sub>CO<sub>2</sub> for CO oxidation. This might be caused that the Ti atoms on Ti<sub>2</sub>CO<sub>2</sub> have more empty d states; therefore, the interaction with adsorbed O<sub>2</sub> is stronger than Cr/Ti<sub>2</sub>CO<sub>2</sub>. As a result, the adsorbed O<sub>2</sub> would be more active on Ti/Ti<sub>2</sub>CO<sub>2</sub>, and Ti/Ti<sub>2</sub>CO<sub>2</sub> would have higher catalytic activity.



**Table S21.** Energy barriers E (eV) and reaction energies  $\Delta E$  (eV) of each state on different single-metal atom catalysts. The bolds mean the highest energy barrier or endothermic process. / means the energies that were not given in the ref. ~ means the energies were got from Figures.

| Catalysts                          |    | Reaction Process                                            | E                                             | $\Delta E$  | Ref       |
|------------------------------------|----|-------------------------------------------------------------|-----------------------------------------------|-------------|-----------|
|                                    | ER | $\text{CO} + \text{O}_2 \rightarrow \text{CO}_3$            | <b>0.25</b>                                   | -3.67       |           |
|                                    |    | $\text{CO}_3 + \text{CO} \rightarrow 2\text{CO}_2$          | 0.23                                          | -0.39       |           |
| Ti/Ti <sub>2</sub> CO <sub>2</sub> |    | $\text{CO} + \text{O}_2 \rightarrow \text{CO}_2 + \text{O}$ | 0.33                                          | -3.59       | This work |
|                                    | LH | $\text{CO} + \text{O} \rightarrow \text{OCO}$               | <b>0.35</b>                                   | <b>0.15</b> |           |
|                                    |    | $\text{OCO} \rightarrow \text{CO}_2$                        | <b>0.35</b>                                   | <b>0.14</b> |           |
| Fe/Graphene                        | ER | $\text{CO} + \text{O}_2 \rightarrow \text{CO}_3$            | <b>0.58</b>                                   | -3.73       | [1]       |
|                                    |    | $\text{CO}_3 + \text{CO} \rightarrow 2\text{CO}_2$          | 0.57                                          | -1.68       |           |
| Oxygen-Defective                   | LH | $\text{CO} + \text{O}_2 \rightarrow \text{CO}_2 + \text{O}$ | 0.49                                          | -1.98       | [2]       |
| Pt/FeO <sub>x</sub>                |    | $\text{CO} + \text{O} \rightarrow \text{CO}_2$              | <b>0.79</b>                                   | -0.20       |           |
| Oxygen-Defective                   | LH | $\text{CO} + \text{O}_2 \rightarrow \text{CO}_2 + \text{O}$ | 0.43                                          | -1.5        |           |
|                                    |    | Rh/FeO <sub>x</sub>                                         | $\text{CO} + \text{O} \rightarrow \text{OCO}$ | 0.00        |           |
|                                    |    | $\text{OCO} \rightarrow \text{CO}_2$                        | <b>0.53</b>                                   | <b>0.44</b> |           |
|                                    |    | $\text{CO} + \text{O}_2 \rightarrow \text{CO}_2 + \text{O}$ | 0.53                                          | -2.26       |           |
| Oxygen-Defective                   | LH | $\text{CO} + \text{O} \rightarrow \text{OCO}$               | <b>0.57</b>                                   | -0.35       |           |
| Pd/FeO <sub>x</sub>                |    | $\text{OCO} \rightarrow \text{CO}_2$                        | 0.55                                          | <b>0.17</b> |           |
|                                    |    | $\text{CO} + \text{O}_2 \rightarrow \text{CO}_2 + \text{O}$ | 0.27                                          | -0.99       |           |
|                                    |    | $\text{CO} + \text{O} \rightarrow \text{OCO}$               | <b>0.79</b>                                   | <b>0.44</b> |           |
| Oxygen-Defective                   | LH | $\text{OCO} \rightarrow \text{CO}_2$                        | 0.12                                          | <b>0.09</b> | [3]       |
| Ru/FeO <sub>x</sub>                |    | $\text{CO}_2$ release                                       | -                                             | <b>0.44</b> |           |
| Vacancy-Free                       | LH | $\text{CO} + \text{O}_2 \rightarrow \text{OOCO}$            | <b>0.45</b>                                   | -0.52       |           |
|                                    |    | $\text{OOCO} \rightarrow \text{O} + \text{CO}_2$            | 0.00                                          | -2.54       |           |
| Co/FeO <sub>x</sub>                |    | $\text{O} + \text{CO} \rightarrow \text{CO}_2$              | 0.00                                          | -2.36       |           |
| Vacancy-Free                       | LH | $\text{CO} + \text{O}_2 \rightarrow \text{OOCO}$            | <b>0.37</b>                                   | -0.11       |           |
|                                    |    | $\text{OOCO} \rightarrow \text{O} + \text{CO}_2$            | 0.00                                          | -2.40       |           |
| Ti/FeO <sub>x</sub>                |    | $\text{O} + \text{CO} \rightarrow \text{CO}_2$              | 0.00                                          | -2.24       |           |

| Vacancy-Free<br>Ru/FeO <sub>x</sub> | LH | CO+O <sub>2</sub> → OOCO               | 0.26        | -0.26       |     |
|-------------------------------------|----|----------------------------------------|-------------|-------------|-----|
|                                     |    | OOCO → O+CO <sub>2</sub>               | 0.00        | -3.49       |     |
|                                     |    | O+CO → CO <sub>2</sub>                 | <b>0.27</b> | -0.99       |     |
| Catalysts                           |    | Reaction Process                       | E           | ΔE          | Ref |
| Cu/Graphene                         | LH | CO+O <sub>2</sub> → OOCO               | 0.25        | -0.77       |     |
|                                     |    | OOCO → O+CO <sub>2</sub>               | <b>0.54</b> | -1.79       | [4] |
|                                     | ER | O+CO → CO <sub>2</sub>                 | 0.00        | -           |     |
| Pt/pri-Graphene                     | LH | CO+O <sub>2</sub> → CO <sub>2</sub> +O | <b>1.03</b> | ~-1.8       |     |
|                                     |    | CO+O <sub>2</sub> → CO <sub>3</sub>    | 0.23        | ~-4.2       |     |
| Single-Vacancy<br>Pt/Graphene       | ER | CO <sub>3</sub> → CO <sub>2</sub> +O   | <b>0.77</b> | ~-0.2       | [5] |
| Fe/h-BN                             | ER | CO+O → CO <sub>2</sub>                 | 0.59        | ~-1.0       |     |
|                                     |    | CO+O <sub>2</sub> → CO <sub>2</sub> +O | <b>0.58</b> | ~3.3        |     |
|                                     | LH | CO+O <sub>2</sub> → CO <sub>2</sub> +O | 0.56        | ~-4         |     |
| Ru/h-BN                             | ER | CO+O → CO <sub>2</sub>                 | <b>0.61</b> | ~-0.8       | [6] |
|                                     |    | CO+O <sub>2</sub> → OOCO               | <b>0.41</b> | <b>0.38</b> |     |
|                                     | LH | OOCO → O+CO <sub>2</sub>               | 0.39        | -3.59       |     |
| Fe/Graphene<br>Oxide                | ER | CO+O → COO                             | 0.37        | -0.29       |     |
|                                     |    | COO → CO <sub>2</sub>                  | 0.28        | /           | [7] |
|                                     | LH | CO+O <sub>2</sub> → CO <sub>2</sub> +O | 0.42        | -4.06       |     |
| Fe/Graphyne                         | ER | CO+O → CO <sub>2</sub>                 | <b>0.71</b> | /           |     |
|                                     |    | CO+O <sub>2</sub> → CO <sub>2</sub> +O | <b>2.03</b> | -2.52       |     |
|                                     | LH | CO+O <sub>2</sub> → CO <sub>3</sub>    | 0.60        | -3.47       |     |
| Fe/Graphyne                         | ER | CO <sub>3</sub> → O+CO                 | 0.86        | <b>0.69</b> | [8] |
|                                     |    | CO+O → CO <sub>2</sub>                 | <b>0.93</b> | -1.88       |     |
|                                     | LH | CO <sub>3</sub> +CO → 2CO <sub>2</sub> | <b>0.70</b> | -1.42       |     |
| Fe/Graphyne                         | ER | CO+O <sub>2</sub> → CO <sub>2</sub> +O | <b>1.06</b> | ~-3.5       |     |
|                                     |    | CO+O <sub>2</sub> → CO <sub>3</sub>    | 0.21        | -3.30       | [9] |
|                                     |    | CO <sub>3</sub> → CO <sub>2</sub> +O   | 0.07        | /           |     |

| Catalysts   | Reaction Process                               | E                                                           | $\Delta E$  | Ref   |      |
|-------------|------------------------------------------------|-------------------------------------------------------------|-------------|-------|------|
|             | $\text{CO} + \text{O} \rightarrow \text{CO}_2$ | <b>0.89</b>                                                 | $\sim -0.3$ |       |      |
| CoPc        | LH                                             | $\text{CO} + \text{O}_2 \rightarrow \text{CO}_2 + \text{O}$ | <b>0.65</b> | -1.75 |      |
|             |                                                | $\text{CO} + \text{O} \rightarrow \text{CO}_2$              | 0.12        | -4.03 |      |
|             |                                                | $\text{CO} + \text{O}_2 \rightarrow \text{CO}_3$            | <b>1.23</b> | -3.40 |      |
|             | ER                                             | $\text{CO}_3 \rightarrow \text{CO}_2 + \text{O}$            | 0.23        | -0.52 |      |
| FePc        |                                                | $\text{CO} + \text{O} \rightarrow \text{CO}_2$              | 0.10        | -4.29 |      |
|             | LH                                             |                                                             | <b>0.73</b> | /     | [10] |
|             | ER                                             |                                                             | <b>0.85</b> | /     |      |
| CuPc        | LH                                             |                                                             | <b>0.93</b> | /     |      |
|             | ER                                             |                                                             | <b>0.90</b> | /     |      |
| ZnPc        | LH                                             |                                                             | <b>0.51</b> | /     |      |
|             | ER                                             |                                                             | <b>0.85</b> | /     |      |
| Au/Silicene |                                                | $\text{CO} + \text{O}_2 \rightarrow \text{OOCO}$            | 0.28        | -0.27 |      |
|             | LH                                             | $\text{OOCO} \rightarrow \text{OOCO}$                       | 0.10        | -0.18 |      |
|             |                                                | $\text{OOCO} \rightarrow \text{O} + \text{CO}_2$            | <b>0.34</b> | -1.97 | [11] |
|             | ER                                             | $\text{O} + \text{CO} \rightarrow \text{CO}_2$              | <b>0.32</b> | -3.19 |      |

- (1) Li, Y.; Zhou, Z.; Yu, G.; Chen, W.; Chen, Z. *J. Phys. Chem. C* **2010**, *114*, 6250.
- (2) Qiao, B.; Wang, A.; Yang, X.; Allard, L. F.; Jiang, Z.; Cui, Y.; Liu, J.; Li, J.; Zhang, T. *Nat. Chem.* **2011**, *3*, 634.
- (3) Li, F.; Li, Y.; Zeng, X. C.; Chen, Z. *ACS Catal.* **2015**, *5*, 544.
- (4) Song, E. H.; Wen, Z.; Jiang, Q. *J. Phys. Chem. C* **2011**, *115*, 3678.
- (5) Tang, Y.; Yang, Z.; Dai, X. *Phys. Chem. Chem. Phys.* **2012**, *14*, 16566.
- (6) Zhao, P.; Su, Y.; Zhang, Y.; Li, S.-J.; Chen, G. *Chem. Phys. Lett.* **2011**, *515*, 159.
- (7) Huang, C.; Ye, X.; Chen, C.; Lin, S.; Xie, D. *Comput. Theor. Chem.* **2013**, *1011*, 5.
- (8) Li, F.; Zhao, J.; Chen, Z. *J. Phys. Chem. C* **2012**, *116*, 2507.
- (9) Wu, P.; Du, P.; Zhang, H.; Cai, C. *Phys. Chem. Chem. Phys.* **2015**, *17*, 1441.
- (10) Deng, Q.; Zhao, L.; Gao, X.; Zhang, M.; Luo, Y.; Zhao, Y. *Small* **2013**, *9*, 3506.
- (11) Li, C.; Yang, S.; Li, S.-S.; Xia, J.-B.; Li, J. *J. Phys. Chem. C* **2013**, *117*, 483.
